# Supplementary material
Source: HighWire-hosted journal article supplement (https://ard.bmj.com/content/78/7/947)
Supplement: inline-supplementary-material-5 [file inline-supplementary-material-5.xlsx]

## Sheet: Sheet1
Supplementary Table 3. Abundance of commensal taxa in in patients with renal disease.
	Mean Relative Abundance		AUC	95% CI		P-value	Genus	Species
	No	Yes
ASV:27:Species:putredinis	0.0257299	0.010844	0.294	0.188	0.401	0.00341613	Alistipes	putredinis
ASV:31:Family:Lachnospiraceae	0.00696553	0.0160925	0.654	0.536	0.773	0.0465763	Ruminococcus	gnavus
ASV:51:Genus:Christensenellaceae_R-7_group	0.00386463	0.000393846	0.411	0.339	0.483	0.0315158	Christensenellaceae_R-7_group
ASV:60:Genus:Lachnospiraceae_NK4A136_group	0.00298255	0.00034724	0.364	0.263	0.465	0.0267676	Lachnospiraceae_NK4A136_group
ASV:67:Species:muciniphila	0.00721006	0	0.354	0.278	0.43	0.00094555	Akkermansia	muciniphila
ASV:86:Species:wadsworthia	0.0134795	0.00156082	0.342	0.229	0.454	0.0275386	Bilophila	wadsworthia
ASV:100:Species:uniformis	0.00359468	0	0.438	0.382	0.493	0.0377778	Bacteroides	uniformis
ASV:120:Species:nexilis	1.85763e-05	0.00285929	0.694	0.619	0.769	0.00123742	Tyzzerella_4	nexilis
ASV:122:Species:celatum/disporicum/saudiense	0.00113404	0.00564784	0.64	0.534	0.745	0.0472824	Clostridium_sensu_stricto_1	celatum/disporicum/saudiense
ASV:129:Species:dispar/parvula	0	0.00513706	0.632	0.57	0.695	0.00707502	Veillonella	dispar/parvula
ASV:200:Family:Lachnospiraceae	0.000589809	9.95168e-05	0.399	0.312	0.485	0.0492081
ASV:209:Genus:Agathobacter	0.00135886	0.000230031	0.351	0.26	0.442	0.00696912	Agathobacter
ASV:220:Genus:Lachnospiraceae_UCG-001	0.00115283	8.54857e-05	0.382	0.299	0.466	0.0167274	Lachnospiraceae_UCG-001
ASV:238:Genus:UC5-1-2E3	0.00104558	7.19642e-06	0.407	0.335	0.48	0.0250842	UC5-1-2E3
ASV:247:Genus:Ruminiclostridium_5	0.000235477	0.00185937	0.637	0.546	0.729	0.0286184	Ruminiclostridium_5
ASV:255:Species:parvula/rogosae/tobetsuensis	5.02513e-06	0.000534133	0.632	0.561	0.703	0.0131024	Veillonella	parvula/rogosae/tobetsuensis
ASV:274:Genus:Oscillibacter	0.000139536	6.70738e-05	0.369	0.267	0.471	0.036568	Oscillibacter
ASV:312:Genus:Lachnospira	0.000643423	0	0.417	0.354	0.479	0.0152752	Lachnospira
ASV:318:Family:Lachnospiraceae	0.000701428	0.00015078	0.379	0.283	0.476	0.0392946
ASV:334:Species:vulgatus	0.00247526	0	0.438	0.382	0.493	0.0377778	Bacteroides	vulgatus
ASV:414:Species:caccae	0.000182981	0.00144252	0.634	0.534	0.733	0.0465239	Anaerostipes	caccae
ASV:439:Genus:Butyricimonas	0.00114058	0	0.438	0.382	0.493	0.0377778	Butyricimonas
ASV:487:Genus:Ruminococcaceae_UCG-014	0.000804643	0	0.438	0.382	0.493	0.0377778	Ruminococcaceae_UCG-014
ASV:499:Species:perfringens/thermophilus	0	0.000656586	0.588	0.534	0.642	0.0327149	Clostridium_sensu_stricto_1	perfringens/thermophilus
ASV:565:Family:Lachnospiraceae	4.62743e-05	0	0.396	0.328	0.464	0.00613906
ASV:627:Genus:Lachnoclostridium	0.000211927	0	0.438	0.382	0.493	0.0377778	Lachnoclostridium
ASV:648:Family:Christensenellaceae	8.61013e-05	5.1403e-06	0.407	0.335	0.48	0.0250842
ASV:787:Genus:Christensenellaceae_R-7_group	5.22961e-05	0	0.438	0.382	0.493	0.0377778	Christensenellaceae_R-7_group
ASV:837:Family:Ruminococcaceae	9.12354e-05	2.75124e-05	0.387	0.304	0.471	0.0218808
ASV:852:Genus:Ruminococcaceae_UCG-005	5.91282e-05	0	0.438	0.382	0.493	0.0377778	Ruminococcaceae_UCG-005
ASV:920:Genus:Blautia	0.000432697	0	0.438	0.382	0.493	0.0377778	Blautia
ASV:1162:Class:Clostridia	0.000238742	0	0.438	0.382	0.493	0.0377778
Data for 34 Lupus patients with history of renal disease and 24 Lupus patients without renal disease were assessed.
Assignment based on ACR criteria for a history of renal disease (ref.2). Taxa with representations of less than 0.001% were not indicated.
ASV:31:Family Lachnospiracaea identified R. gnavus based on Greengenes assignment.
