# Supplementary material
Source: HighWire-hosted journal article supplement (https://ard.bmj.com/content/78/7/947)
Supplement: inline-supplementary-material-8 [file inline-supplementary-material-8.docx]

Supplementary Figure 2

**Supplementary Figure 2. Anti-DNA antibody Inhibition studies underscore the native DNA-like binding epitope(s) of *RG2*.** (***A-D***) Inhibition assays were performed by preincubation of diluted Lupus serum with the inhibitor in sandwich ELISA, as indicated. ***A)*** Native mammalian DNA in solution inhibits in a dose-dependent manner the binding of IgG in a representative Lupus serum (S-047) to immobilized calf thymus DNA on the solid phase. ***B)*** Nuclease-treated *RG2* extract is responsible for dose-dependent inhibition of the binding of IgG in the Lupus serum to immobilized calf thymus DNA on the solid phase. ***C)*** Preincubation of this representative Lupus sera with soluble *RG2* extract inhibits binding of IgG to the *RG2* on the solid phase. ***D)*** Preincubation of the Lupus serum with soluble native mammalian DNA has little inhibitory capacity for the binding of IgG to treated *RG2* extract on a solid phase. ***E-J)*** Fine binding specificity of Lupus serum IgG with a circular native DNA-containing organelle in *Crithidia lucillae*. ***E)*** A positive control serum, provided by the manufacturer, is associated with reactivity with the *Crithidia lucillae* kinetoplast (indicated with red arrows) and the nucleus. A representative Lupus serum IgG is reactive in panel ***F*** and panel ***G*** at 1:40 and 1:100 final dilution, respectively. ***H)*** Serum from an unaffected healthy subject is non-reactive. ***I)*** After preincubation of mammalian native DNA (100 g/uL, final concentration) with a Lupus serum at 1:40 final dilution. ***J)*** After preincubation of *RG2* extract (100 g/mL) with a Lupus serum at 1:40 final dilution. S-047, a patient with high SLEDAI and active LN.
